# Supplementary material for: Participant perceptions and experiences of a novel community-based pilot respiratory longitudinal sampling method in Liverpool, UK
Source: bioRxiv or medRxiv preprint supplement (doi:10.1101/2023.05.18.23289716), 2023-05-18
Supplement: Supplementary file [file media-3.pdf]

### **Coding framework for FAMILY Micro Study interviews**

- Favourable opinions
- Discomfort
  - Nasosorption samples
  - Saliva samples
  - Effect of Age
  - Impact of COVID swabs on this experience
    - Positive
    - Negative
- Disgust
  - Saliva samples
  - Effect of Age
- Inconvenience
  - Time taken
  - Disruption to family life
  - Freezer space
  - Length of study & maintaining motivation: effect of Covid
- Lack of clarity
  - Initial information: effect of Covid
  - Effect of occupation
  - Questionnaire wording
